# Supplementary material for: A pencil-and-paper method for elucidating halide double perovskite band structures
Source: Royal Society of Chemistry journal article supplement (doi:10.1039/c9sc03219c), 2019-01-01
Supplement: c9sc03219c2.pdf [file c9sc03219c2.pdf]

# A Pencil and Paper Approach for Identifying Exciting New Halide Double Perovskites

Lead-halide 3D perovskites show promising photovoltaic performance

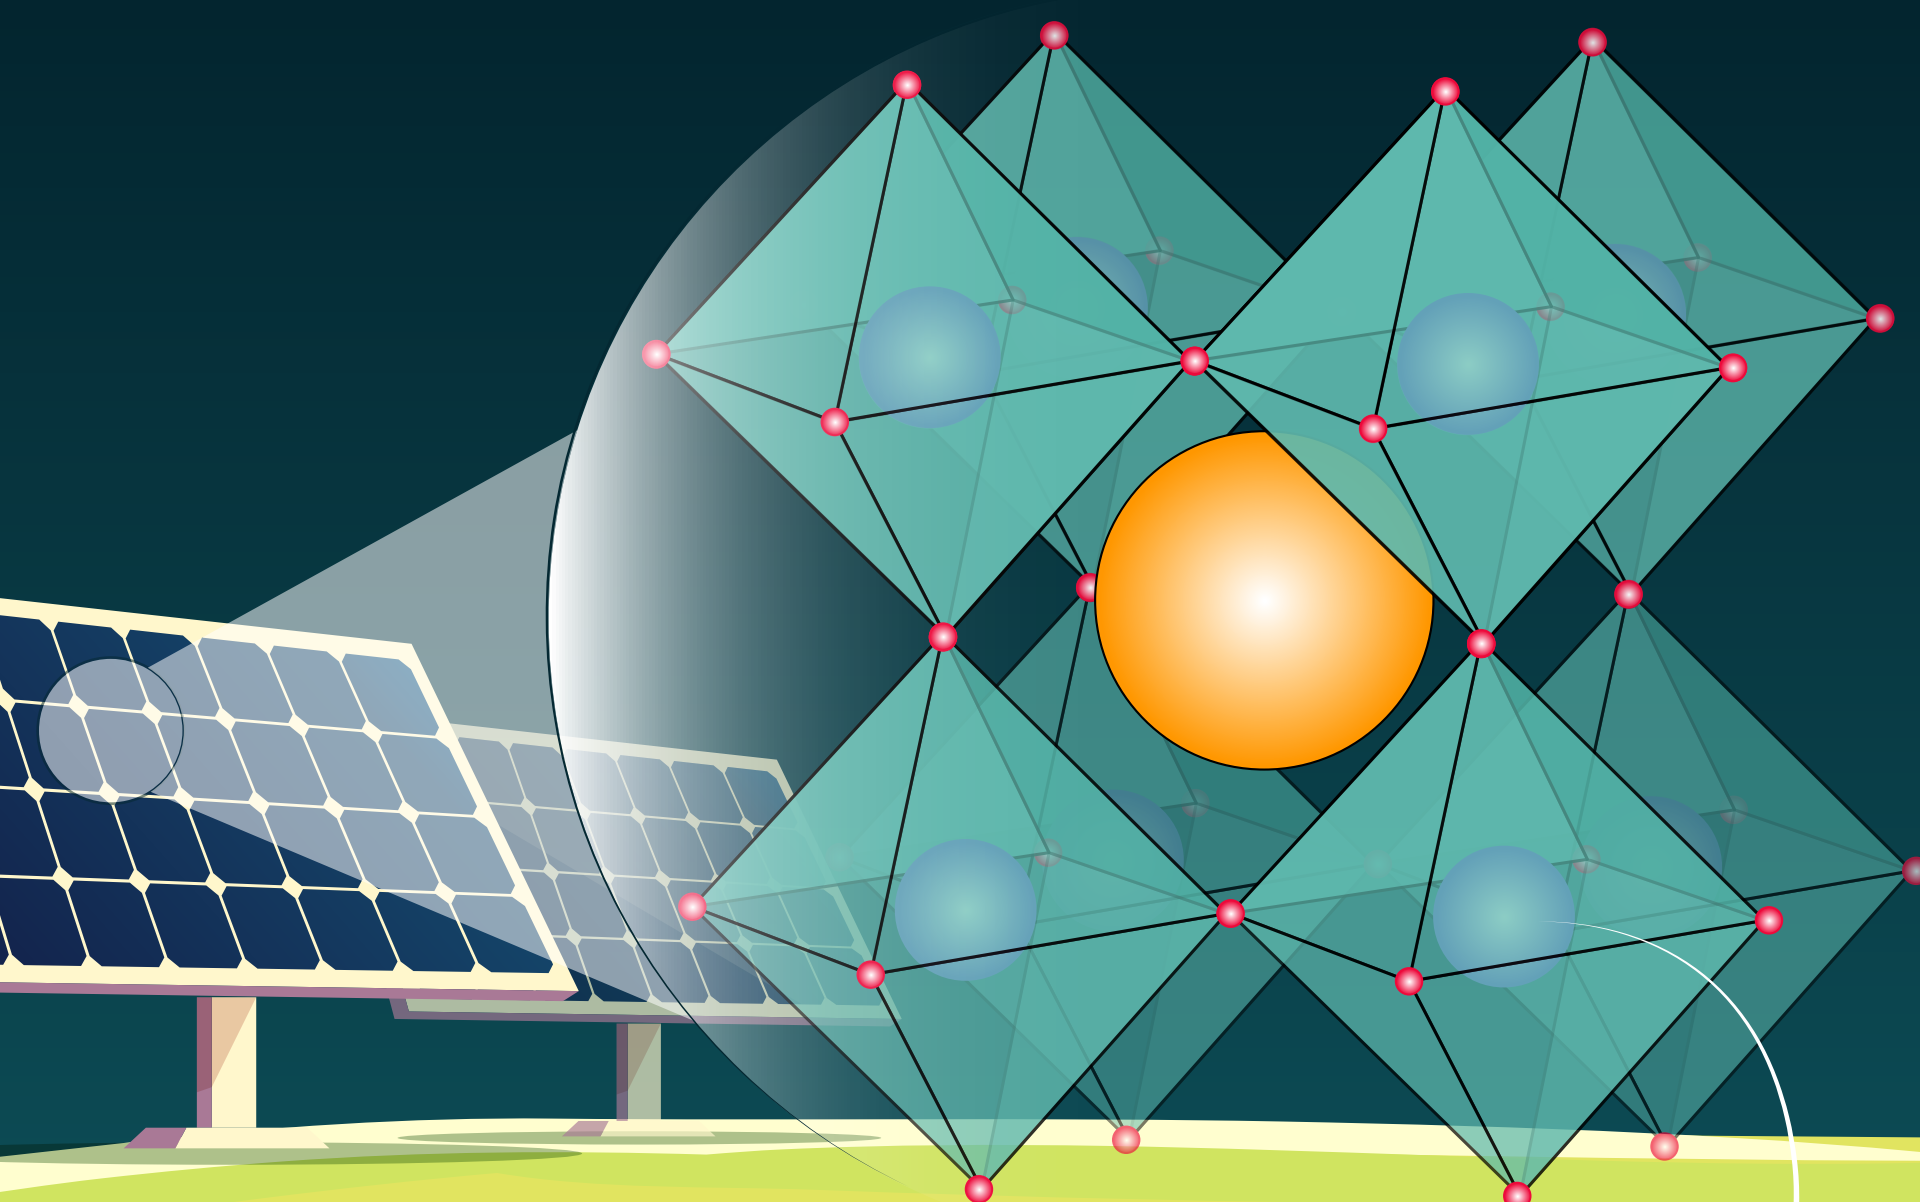

But, the toxic lead content makes them less desirable

**Pb**

Double perovskites ( $A_2BB'X_6$ ) can be a suitable alternative, but they have complex and diverse electronic structure

A theoretical method to predict perovskites with suitable bandgaps to act as potential solar absorbers

## Linear combination of atomic orbitals [LCAO]

- 1 Double perovskite crystal structure
- 2 Linear combinations of halide orbitals
- 3 Applying translational symmetry
- 4 Adding metal interactions

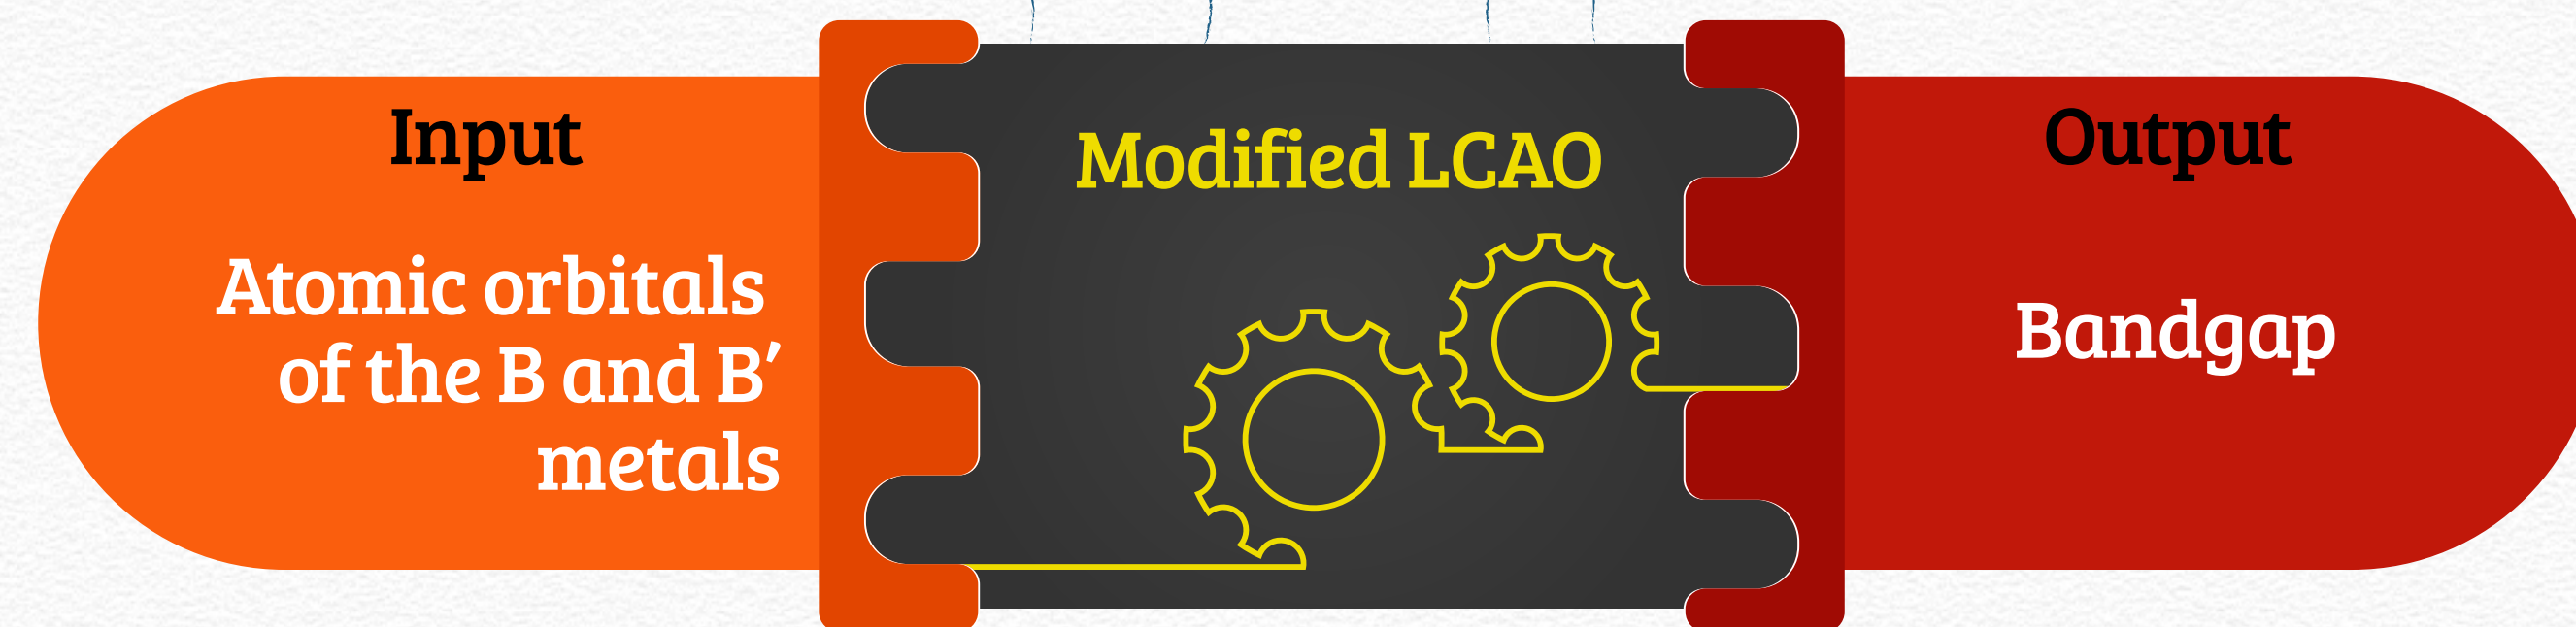

This modification of the LCAO approach allows us to apply it to all halide double perovskites

The modified LCAO approach is expected to help the synthesis of new and interesting double perovskite compositions which can act as potential solar absorbers

Chemical  
Science

PICK  
OF THE  
WEEK

A pencil-and-paper method for elucidating halide double perovskite band structures

Slavney *et al.* (2019) | DOI: 10.1039/C9SC03219C

ROYAL SOCIETY  
OF CHEMISTRY
